# Supplementary material
Source: Springer Nature journal article supplement (https://www.springermedizin.de/resource/supplementary/12888_2009_580_MOESM2_ESM.pdf/9483654)
Supplement: MOESM2 [file 9483654]

Patients with family history of suicide

Patients without family history of suicide

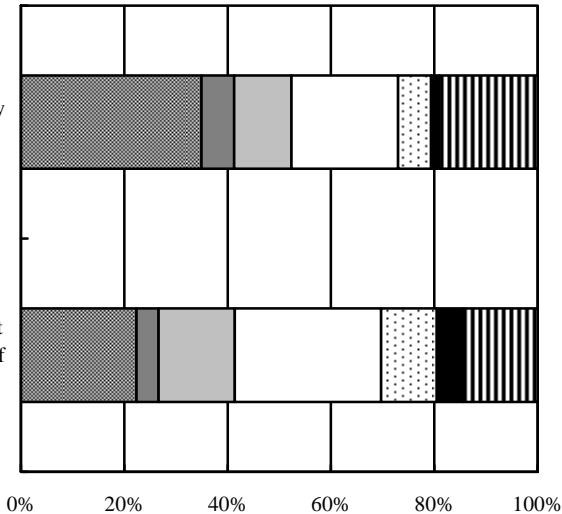

- family relations
- human relations (work place or school)
- male-female relationships
- health issues
- financial situation
- work environment
- other reason
